# Supplementary material
Source: PubMed Central journal article supplement (PMC4806896)

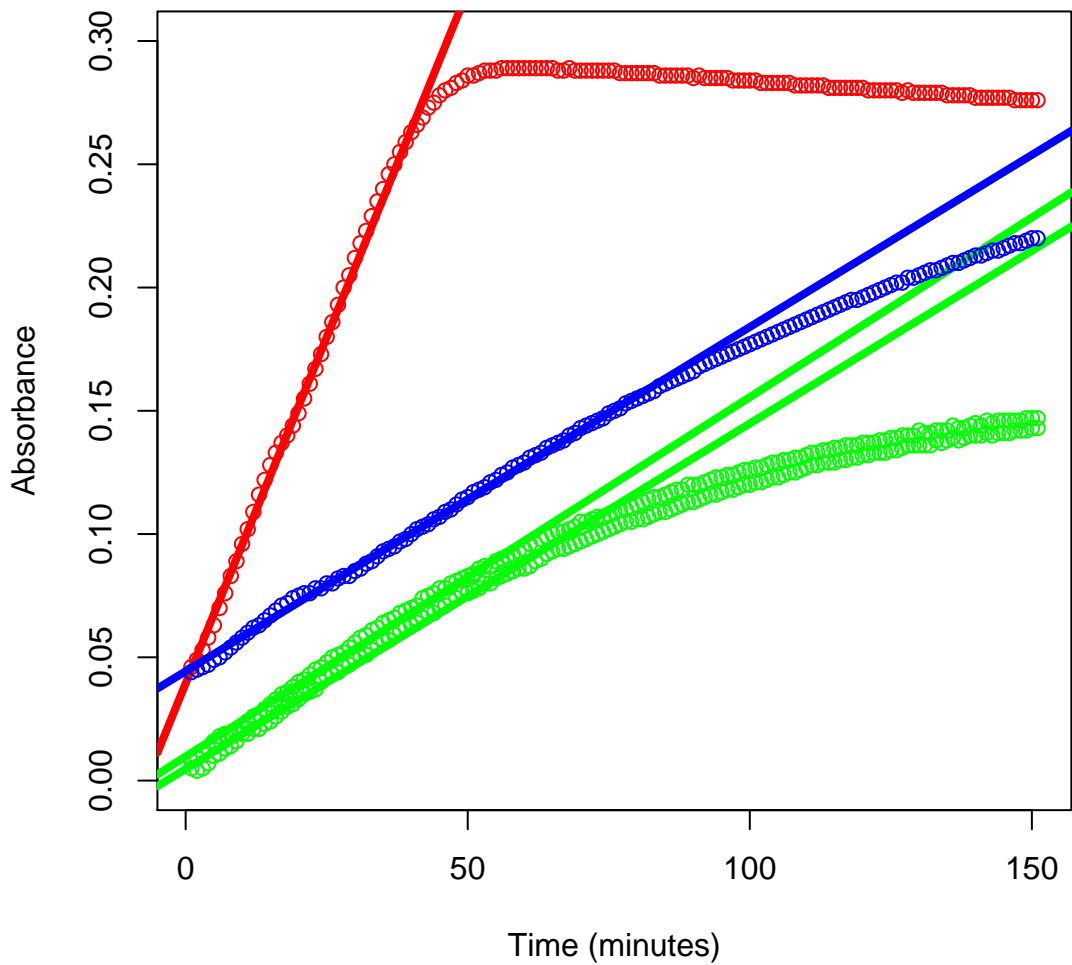

Supplement: hdy201550x2.pdf [file hdy201550x2.pdf]

# Supplemental Figure 2

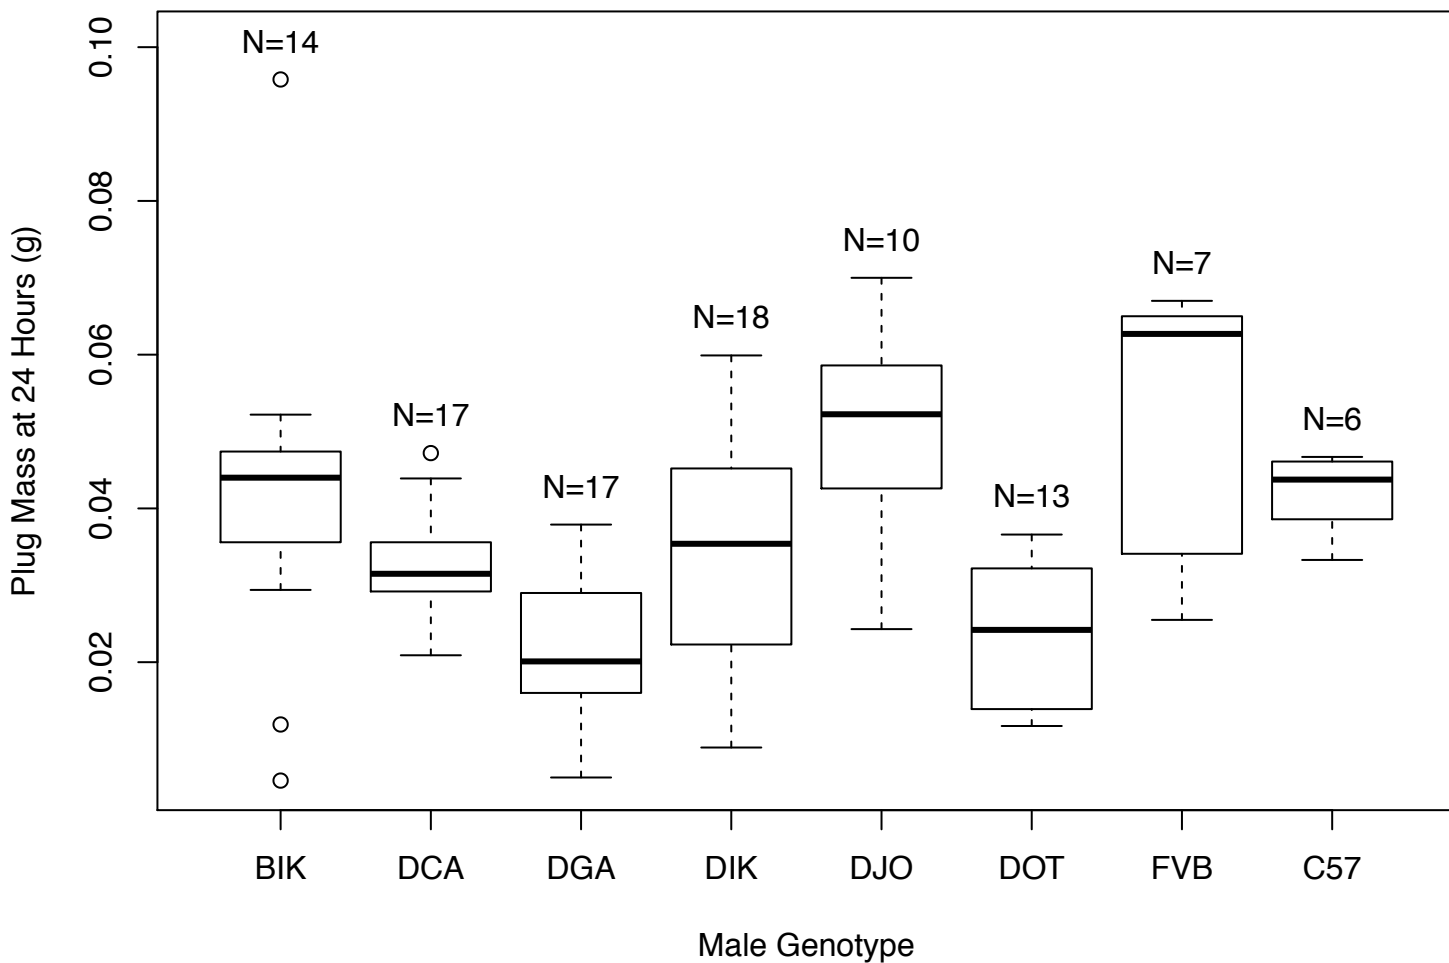

Supplement: hdy201550x3.pdf [file hdy201550x3.pdf]

# Supplemental Figure 5

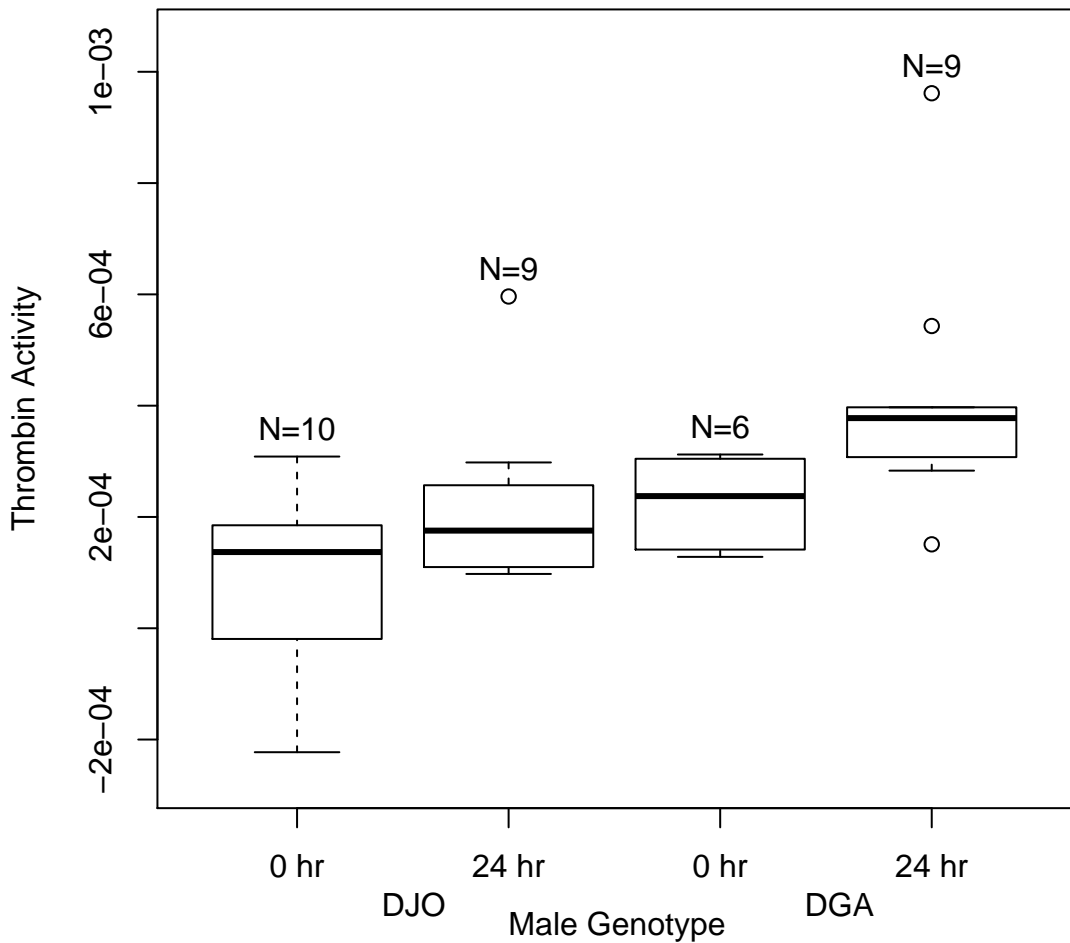

Supplement: hdy201550x5.pdf [file hdy201550x5.pdf]
